1 **High-content assay for CFTR monitoring: simultaneous quantification of channel**  
2 **function and biogenesis.**

3 Stella Prins<sup>1</sup>, Emily Langron<sup>1</sup>, Cato Hastings<sup>2</sup>, Emily J. Hill<sup>1</sup>, Andra C. Stefan<sup>3</sup>, Lewis D.  
4 Griffin<sup>2</sup> and Paola Vergani<sup>1\*</sup>

5

6 <sup>1</sup> Department of Neuroscience, Physiology and Pharmacology

7 <sup>2</sup> CoMPLEX

8 <sup>3</sup> Natural Sciences

9

10 University College London

11 Gower Street

12 WC1E 6BT London UK

13

14 The first two authors contributed equally to this project.

15 \*Correspondence to: [p.vergani@ucl.ac.uk](mailto:p.vergani@ucl.ac.uk)

16

17 Running title: Simultaneous screening of CFTR biogenesis and function

18 **Summary**

19 CFTR mutations cause cystic fibrosis by affecting how many channels reach the membrane,  
20 and/or how well they work. This study presents an assay that simultaneously measures CFTR  
21 biogenesis and function. A screen of 62 disease-causing mutations provides clues on how  
22 approved drug VX-770 works.

23

24 **Abstract**

25 Cystic fibrosis (CF) is a life-limiting disease caused by mutations in the *CFTR* gene,  
26 encoding a plasma membrane anion-selective channel. Because CF-causing mutations affect  
27 both CFTR permeation/gating and biogenesis, multi-assay approaches have been implemented  
28 in drug development, sequentially screening for channel function and membrane density. Here  
29 we present the first assay capable of simultaneous assessment of both CFTR characteristics.

30 To validate our assay, we investigate F508del-CFTR, the most common disease-  
31 causing mutant, confirming rescue by incubation at low temperature, treatment with CFTR-  
32 targeting drugs and introduction of second-site revertant mutation R1070W. In addition, we  
33 characterize a panel of 62 CF-causing mutations and profile effects of acute treatment with  
34 approved drug VX-770 (ivacaftor). Measurements using the rare mutation panel correlate well  
35 with published results, further validating the assay. Furthermore, mapping the potentiation  
36 profile on CFTR structures raises mechanistic hypotheses on drug action, suggesting that VX-  
37 770 might allow an open-channel conformation with an alternative arrangement of domain  
38 interfaces around site 1.

39 The assay is a powerful tool for investigation of CFTR ion channel biophysics, allowing  
40 rapid and accurate inferences on gating/permeation properties and on how these are affected  
41 by mutations and compounds. By providing a two-dimensional molecular characterization of  
42 mutant CFTR proteins, our assay can better inform development of therapies tailored for  
43 individual CFTR variants. Finally, the integrated assay boosts the potential for discovery of  
44 dual-acting compounds, simultaneously repairing both biogenesis and function.

45

46 **Keywords:** protein transport, fluorescence imaging, precision medicine, VX-770.

47 **Non-standard Abbreviations**

|    |                           |                                                                        |
|----|---------------------------|------------------------------------------------------------------------|
| 48 | ABC                       | ATP-binding cassette                                                   |
| 49 | CF                        | Cystic Fibrosis                                                        |
| 50 | CFTR                      | Cystic Fibrosis Transmembrane Conductance Regulator                    |
| 51 | $F_{\text{mCherry cell}}$ | average normalized mCherry fluorescence intensity over the entire cell |
| 52 | $F_{\text{YFP cell}}$     | average normalized YFP fluorescence intensity over the entire cell     |
| 53 | $F_{\text{YFP membrane}}$ | average normalized YFP fluorescence intensity within the membrane zone |
| 54 | $G_{\text{CFTR}}$         | CFTR conductance                                                       |
| 55 | $G_{\text{trans}}$        | transient anion conductance                                            |
| 56 | IRES                      | internal ribosome entry site                                           |
| 57 | NBD                       | nucleotide binding domain                                              |
| 58 | PDL                       | poly-D-lysine                                                          |
| 59 | $P_{\text{O}}$            | open probability                                                       |
| 60 | $\rho$                    | CFTR membrane density, as defined in this paper                        |
| 61 | SSR                       | sum of squared residuals                                               |
| 62 | $\tau_{\text{trans}}$     | time constant of the transient anion conductance                       |
| 63 | TM                        | transmembrane helix                                                    |
| 64 | $V_{\text{M}}$            | membrane potential                                                     |
| 65 | WT                        | wild type                                                              |
| 66 | YFP                       | yellow fluorescent protein                                             |

## 67 **Introduction**

68 Cystic fibrosis (CF) is a common life-limiting genetic disease. Although the median  
69 survival age has increased by almost 12 years over the last decade, the disease still strongly  
70 impacts expectation and quality of life (Elborn, 2016).

71 CF is caused by mutations in the *CFTR* gene (Riordan et al., 1989; Rommens et al.,  
72 1989), encoding an anion-selective channel (Csanády et al., 2019) present on the apical plasma  
73 membrane of epithelial cells. These mutations decrease the density of CFTR channels located  
74 on the cell membrane (by affecting protein synthesis, folding, intracellular trafficking, plasma  
75 membrane stability), and/or impair channel function (impacting on gating or anion  
76 permeation). As a result, transepithelial fluid movement is abnormal, creating problems  
77 particularly affecting lungs, pancreas, intestines, liver and reproductive systems.

78 Engineering of a halide sensitive YFP with increased affinity for iodide and a low  
79 affinity for chloride (Galiotta et al., 2001a; Galiotta et al., 2001b), allowed the first high  
80 throughput screening projects, which assessed CFTR activity by measuring the rate of YFP  
81 quenching caused by iodide influx and chloride efflux (Ma et al., 2002; Pedemonte et al.,  
82 2005a; Pedemonte et al., 2005b; Yang et al., 2003). Later, Vertex Pharmaceuticals used  
83 changes in membrane potential, monitored through fluorescence resonance energy transfer, to  
84 indirectly quantify CFTR channel function (Van Goor et al., 2009; Van Goor et al., 2006).

85 These efforts led to the identification of the first CFTR modulator drugs, directly  
86 targeting the defective CFTR protein. Modulators have been classified as either “potentiators”,  
87 increasing CFTR channel function, or “correctors” increasing the number of CFTR channels  
88 on the plasma membrane. The potentiator ivacaftor (VX-770, Vertex Pharmaceuticals) (Van  
89 Goor et al., 2009) is now approved for the treatment of patients carrying the G551D gating  
90 mutation and a number of other mutations impairing channel function (Gentzsch and Mall,  
91 2018). However, neither potentiation by VX-770 on its own (Flume et al., 2012), nor treatment  
92 with the corrector, VX-809 (Van Goor et al., 2011), alone (Clancy et al., 2012), significantly  
93 improves lung function of patients homozygous for the F508del mutation, present on at least  
94 one allele in ~90% of patients. Like many other CF-causing mutations, F508del results not only  
95 in ion channel dysfunction, but also in a reduction of the number of channels present at the cell  
96 surface. Combination treatment with VX-770 and VX-809 provides small but significant health  
97 benefits (Wainwright et al., 2015). Triple combination therapies, combining two different  
98 correctors with a potentiator, hold promise to further improve patient outcomes (Davies et al.,  
99 2018; Keating et al., 2018).

100 More than 300 CF-causing mutations have been characterized (The Clinical and  
101 Functional TRanslation of CFTR (CFTR2); available at <http://cftr2.org>). Each mutation, other  
102 than F508del, is extremely rare, and is likely to affect the folding, trafficking, stability, gating  
103 dynamics and/or permeation of the encoded CFTR protein differently. Pre-clinical data  
104 informing on how mutations and drugs affect individual CFTR variants in controlled, *in vitro*  
105 systems, is thus very valuable for drug development and trial design.

106 Here we present a medium-throughput image-based assay that acquires multi-  
107 dimensional data (dual-colour fluorescence intensity in time and space) on individual live  
108 HEK293 cells and extracts information on two key characteristics of CFTR. By co-expressing  
109 soluble mCherry with the halide sensitive YFP (Galiotta et al., 2001a) linked to CFTR (Langron  
110 et al., 2017), our new assay gives readouts of both CFTR function, and CFTR membrane  
111 density. Experimental manipulation - incubation at low temperature (Denning et al., 1992;  
112 Rennolds et al., 2008; Wang et al., 2008), treatment with VX-809 (He et al., 2013; Okiyoneda  
113 et al., 2013) with and without VX-770 (Cholon et al., 2014; Veit et al., 2014), and addition of  
114 revertant mutation R1070W (Farinha et al., 2013; Okiyoneda et al., 2013; Thibodeau et al.,  
115 2010) - results in the expected changes in measured F508del-CFTR channel function and  
116 membrane density. Finally, we present a screening platform suitable for quantifying the  
117 molecular characteristics of 62 CFTR variants carried by CF patients, and profile the effects of  
118 VX-770 on this panel. Our results validate the assay as a valuable tool for investigation of  
119 CFTR molecular mechanism and pharmacology.

120

121

## 122 **Materials and methods**

### 123 *Construction of the pIRES2-mCherry-YFPCFTR plasmid*

124 The pIRES2-mCherry-YFPCFTR plasmid was obtained with two sequential  
125 subcloning steps. First, a 1.727kb region of pcDNA3.1-YFP-CFTR (Langron et al., 2017),  
126 containing the YFP-coding sequence, was subcloned into pIRES-eGFP-CFTR, a gift from  
127 David Gadsby (Rockefeller University), using the NheI and BlnI restriction sites. Subsequently  
128 a 0.737 kb region from pIRES2-mCherry-p53 deltaN (Lin et al., 2013) (Addgene), containing  
129 the mCherry-coding segment and part of the IRES, was subcloned into the pIRES-eGFP-  
130 YFPCFTR plasmid using the NotI and BmgBI/BtrI restriction sites. This resulted in the  
131 pIRES2-mCherry-YFPCFTR plasmid, with the IRES2 positioned between the two open  
132 reading frames for mCherry and YFP-CFTR.

133

134 *HEK293 cell culture, transfection and incubation*

135 HEK293 cells were maintained in Dulbecco's modified Eagle's medium (DMEM),  
136 supplemented with 2 mM L-glutamine, 100 U/ml penicillin and streptomycin, and 10% fetal  
137 bovine serum (all Life Technologies). Cells were seeded in poly-D-lysine-coated, black-walled  
138 96-well plates (Costar, Fisher Scientific), and transiently transfected with the pIRES2-  
139 mCherry-YFPCFTR plasmid using Lipofectamine 2000 (Life Technologies). After  
140 transfection, cell plates were returned to the 37°C incubator for 24 hours. Prior to imaging  
141 plates were incubated for another 24 hours, at 37°C or 28°C, in 100 µl DMEM including  
142 DMSO (vehicle), 10 µM VX-809, or 10 µM VX-770 plus 10 µM VX-809 (Selleck Chemicals).

143

144 *Image acquisition*

145 Before imaging, cells were washed twice with 100 µL standard buffer (140 mM NaCl,  
146 4.7 mM KCl, 1.2 mM MgCl<sub>2</sub>, 5 mM HEPES, 2.5 mM CaCl<sub>2</sub>, 1mM glucose, pH 7.4). The  
147 ImageXpress Micro XLS (Molecular Devices), an automated inverted wide-field fluorescence  
148 microscope with a temperature-controlled chamber (set to 37°C or 28°C, as indicated), was  
149 used for image acquisition. Protocols for automated fluid additions, enabled by a robotic arm,  
150 were created using MetaXpress software (Molecular Devices). For imaging of  
151 YFP(H148Q/I152L)-CFTR, a 472 ± 30 nm excitation filter, and a 520 ± 35 nm emission filter  
152 were used. Excitation/emission filters at 531 ± 20 nm and 592 ± 20 nm were used for imaging  
153 of mCherry.

154 For localization of CFTR, a 60× objective was used to take 9 16-bit images per well of  
155 both fluorophores. To evaluate CFTR function, a 20× objective was used. Two 16-bit images  
156 of mCherry were taken, one at the start and one the end of the protocol. In addition, 16-bit  
157 images of the YFP fluorescence, were taken at an acquisition frequency of 0.5 Hz. For the I-  
158 first protocol ((A), see below), after 20 s, 50 µl of 300 mM I<sup>-</sup> buffer (300 mM NaI, 4.7 mM  
159 KCl, 1.2 mM MgCl<sub>2</sub>, 5 mM HEPES, 2.5 mM CaCl<sub>2</sub>, 1mM glucose, pH 7.4) was added to the  
160 standard buffer, so that the final concentration of I<sup>-</sup> in the extracellular medium was 100 mM.  
161 Another 40 s later, a further 50 µl of a 100 mM I<sup>-</sup> buffer containing 40 µM forskolin (100 mM  
162 NaI, 4.7 mM KCl, 1.2 mM MgCl<sub>2</sub>, 5 mM HEPES, 2.5 mM CaCl<sub>2</sub>, 1mM glucose, 40 µM  
163 forskolin, pH 7.4) was added, so that the final concentration of forskolin in the extracellular  
164 medium was 10 µM, while concentration of I<sup>-</sup> and other components remained unaltered. For  
165 the I- last protocol ((B), below), after 20 s of imaging, CFTR was activated, in the absence of  
166 extracellular iodide, by addition of 50 µl standard buffer containing activating compounds

167 (forskolin or forskolin + VX-770 both to reach final concentrations of 10  $\mu\text{M}$ ). After a further  
168 230 s, by which time CFTR is assumed to be gating at steady state (Langron et al., 2018), 100  
169 mM extracellular iodide (final concentration) was introduced by adding 50  $\mu\text{l}$  of iodide buffer  
170 (as standard buffer with 140 mM NaCl replaced with 400 mM NaI). Images were taken for 40  
171 more seconds. Activating compounds were also included in the second addition so as not to  
172 alter final extracellular concentrations.

173

#### 174 *Image analysis*

175 Image analysis was automated using MATLAB mathematical computing software  
176 (MathWorks). Separate analysis protocols were implemented to estimate CFTR membrane  
177 density and ion channel function.

178

#### 179 CFTR membrane density

180 First, mCherry images were binarized, and basic morphological operations (opening,  
181 closing, area opening, and dilation) were carried out to reduce noise. A distance transform with  
182 locally imposed minima was used to segment images by means of a watershed transformation  
183 and define cell boundaries. Cells were removed from analysis if they had an area of under 108  
184  $\mu\text{m}^2$  or over 5400  $\mu\text{m}^2$ , if they had a major axis length of less than 32.4  $\mu\text{m}$ , if the area over  
185 perimeter was less than 25 or over 300, and if they were touching the edge of the image. A 1.08  
186  $\mu\text{m}$  band, 10 or 5 pixels wide (depending on the resolution of the image), within the border of  
187 each cell was defined as the membrane zone.

188 Background was selected by inverting the binarized and morphologically opened  
189 mCherry image, after which it was morphologically closed using a large structuring element to  
190 prevent cells from being selected as background. Average background intensity was then  
191 subtracted from each pixel, and the YFP and mCherry fluorescence intensity of each cell was  
192 normalized to the median YFP and mCherry fluorescence intensities of cells expressing WT-  
193 CFTR on the same plate. If the average normalized fluorescence intensity fell below 0 (due to  
194 low transfection efficiency and high background noise), cells were removed from analysis.

195 In order to estimate CFTR membrane density for each cell (defined as  $\rho$ , see Results),  
196 the average normalized YFP fluorescence intensity within the membrane zone was divided by  
197 the average normalized mCherry fluorescence over the entire cell.

$$198 \quad \rho = \frac{F_{\text{YFP membrane}}}{F_{\text{mCherry cell}}}$$

199

## 200 CFTR ion channel function

201 For assessment of CFTR function, two different protocols were used. For both, cells  
202 were selected based on the mCherry fluorescence image that was taken at the beginning of the  
203 protocol.

### 204 (A) $\Gamma$ first Protocol

205 The fluorescence at the time point before addition of  $\Gamma$  was used to normalize YFP  
206 fluorescence intensity. The concentration of  $\Gamma$  inside the cells ( $[I^-]_{in}$ ) can be estimated with the  
207 following equation (Langron et al., 2017), in which the binding affinity for  $\Gamma$  ( $K_I$ ) to  
208 YFP(H148Q/I152L) is 1.9 mM (Galiotta et al., 2001a) and the normalized fluorescence  
209 intensity over time ( $F(t)$ ) is determined experimentally.

$$210 \quad [I^-]_{in} = K_I \frac{(1 - F(t))}{F(t)}$$

211 Data is collected every 2 seconds, so the change  $[I^-]_{in}$  observed at each time point can be  
212 estimated and used to calculate the rate of  $\Gamma$  entry (in mM/s):

$$213 \quad \frac{\Delta[I^-]_{in}}{\Delta t} = \frac{[I^-]_{in}(t) - [I^-]_{in}(t - 1)}{2 \text{ s}}$$

214 The maximal observed rate of  $\Gamma$  entry is used as a measure of cellular anion conductance. To  
215 determine whether there was increased CFTR-mediated anion conductance, the maximal rate  
216 of  $\Gamma$  entry after addition of forskolin (which activates CFTR by cAMP dependent  
217 phosphorylation), was compared to the maximal rate of  $\Gamma$  entry after addition of DMSO  
218 (vehicle, negative control).

### 219 (B) $\Gamma$ last Protocol

220 CFTR activation (by addition of 10  $\mu$ M forskolin with or without 10  $\mu$ M VX-770, as  
221 indicated) was first allowed to reach steady state in the absence of  $\Gamma$  and quenching of YFP in  
222 the 40 s following extracellular  $\Gamma$  addition was measured. A simple mathematical model was  
223 used to fit observed fluorescence quenching, and estimate CFTR conductance as described  
224 (Langron et al., 2018). Briefly, the model includes four free parameters: CFTR conductance at  
225 steady-state ( $G_{CFTR}$ ), membrane potential at steady-state, immediately prior to  $\Gamma$  addition ( $V_M$ ),  
226 and conductance ( $G_{trans}$ ) and time constant ( $\tau_{trans}$ ) of a transient, endogenous non-CFTR anion  
227 conductance. The values of the four parameters were estimated by minimizing the sum of  
228 squared residuals obtained by comparing the time course of the observed average fluorescence  
229 intensity within cells to the proportion of anion-free YFP chromophore predicted by the model  
230 (both normalized to the time point before  $\Gamma$  addition). However, when the quenching time  
231 course was too fast and did not provide enough information to uniquely identify all four



232 parameters, the value of the latter two parameters ( $G_{\text{trans}}$  and  $\tau_{\text{trans}}$ ) was constrained to the  
233 average values obtained with negative controls, and only  $G_{\text{CFTR}}$  and  $V_M$  were estimated  
234 (Langron et al., 2018).

235 For both protocol (A) and (B) the value obtained from analysis of the observed YFP-  
236 CFTR fluorescence quenching ( $\frac{\Delta[I^-]_{in}}{\Delta t}$  and  $G_{\text{CFTR}}$ , respectively) was corrected to account for  
237 variations in transfection efficiency. Thus the metric reporting ion channel function was  
238 normalised for each condition/genotype by dividing by the mean  $F_{\text{mCherry}}$  within the cell  
239 selection (which, in turn, was normalized to  $F_{\text{mCherry}}$  measured for WT in the same plate).

240

#### 241 *Data and Statistical analysis*

242 Measurements of conductance from the rare mutation panel were obtained on 3 or 4  
243 independent plates (each plate containing at least 3 wells per mutant, per condition). As  
244 demonstrated by the good correlation with published datasets (see Results and Supplementary  
245 Figure S8) this is sufficient to give a first characterization of ion channel function, as is required  
246 for most screens. Because  $\rho$  values approach a log-normal distribution, values were log  
247 transformed before performing statistical analysis, allowing parametric testing of the data.

248 To determine whether the observed differences in  $\rho$ ,  $\frac{\Delta[I^-]_{in}}{\Delta t}$ , or  $G_{\text{CFTR}}$  resulting from  
249 experimental manipulation and/or mutations were statistically significant, we performed either  
250 independent or paired t-tests. For  $\rho$  measurements, we noticed that some variability could be  
251 accounted for by variation among plates, and paired comparisons between  
252 treatments/genotypes measured from the same plate increased our power to detect small  
253 differences. When required, either a Bonferroni or a Benjamini-Hochberg correction was  
254 applied to adjust for multiple comparisons. Data in graphs represent mean  $\pm$  SEM, and the  
255 significance level was pre-specified as  $\alpha = 0.05$ . Statistical analysis was carried out using  
256 MATLAB (MathWorks), SigmaPlot (Systat Software), SPSS (IBM), or Excel (Microsoft).

257

#### 258 *Supplemental Material*

259 Tables are given with more information on the statistical analyses performed (S1-S4, S6, S7).  
260 Figure S5 compares distributions of  $\log_{10}\rho$  values of WT-CFTR with each mutant in the rare  
261 mutation panel, as well as plots illustrating the paired t-tests performed. Figure S8 compares  
262 the rare mutation results presented here with two published datasets (Sosnay et al., 2013; Van  
263 Goor et al., 2014). Figure S9 and Table S10 give further information regarding the analysis  
264 used to obtain Figures 4B and 5A.

265

## 266 **Results**

### 267 *The assay*

268 To obtain quantitative information about ion channel function of CFTR, we exploited  
269 a halide-sensitive YFP (Galiotta et al., 2001a; Galiotta et al., 2001b), tagged to the N-terminal  
270 of CFTR (Langron et al., 2018; Langron et al., 2017). We constructed a pIRES2-mCherry-  
271 YFPCFTR plasmid that directs co-expression of YFP(H148Q/I152L)-CFTR (hereafter  
272 designated YFP-WT-CFTR or simply WT-CFTR) and a soluble, cytosolic, red fluorescent  
273 protein, mCherry (Shaner et al., 2004) (Figure 1A). The mCherry expression allows image  
274 segmentation and localization of the cell membrane by marking the border of cells.  
275 Furthermore, mCherry serves as an internal standard for the normalisation of YFP-CFTR  
276 expression, eliminating variability due to unequal transfection efficiency.

277 Yellow fluorescence at the boundaries of areas of red fluorescence is used to estimate  
278 CFTR membrane density for each cell (Figure 1). The “membrane” is defined as comprising a  
279 ~1  $\mu\text{m}$  wide band, on the inside of a cell’s boundary. The density of CFTR at the membrane  
280 ( $\rho$ ), is estimated by dividing the average YFP-CFTR fluorescence intensity within the  
281 membrane zone ( $F_{\text{YFP membrane}}$ ), by the average mCherry fluorescence over the entire cell  
282 ( $F_{\text{mCherry cell}}$ ). The  $\rho$  metric can be thought of as the product of the proportion of CFTR localized  
283 to the membrane ( $F_{\text{YFP membrane}}/F_{\text{YFP cell}}$ ), multiplied by the metabolic stability of YFP-CFTR  
284 with respect to mCherry ( $F_{\text{YFP cell}}/F_{\text{mCherry cell}}$ ). Thus, changes in  $\rho$  metric will reflect not only  
285 changes in CFTR trafficking, but also changes in the overall rates of biosynthesis vs.  
286 degradation of the protein.

287

### 288 *Increasing F508del-CFTR membrane density*

289 To validate our assay, we assessed changes in F508del-CFTR membrane density by  
290 comparing distributions of  $\log_{10}\rho$  (logarithmic transformation of the  $\rho$  metric) obtained from  
291 thousands of cells for each genotype/condition (Figure 2).

292

### 293 F508del-CFTR: VX-809 incubation

294 At 37°C, incubation with VX-809 for 24 hours caused a small but significant increase in  $\log_{10}\rho$   
295 of F508del-CFTR, (Figure 2A left, see also Supplementary Table S1). At 28°C, the magnitude  
296 of the increase was greater (Figure 2A right).

297

### 298 F508del-CFTR: R1070W second-site revertant mutation

299 Introducing the second-site revertant mutation R1070W (Thibodeau et al., 2010) in the  
300 F508del-CFTR background, significantly increased membrane density at 37°C, (Figure 2B left,  
301 Supplementary Table S1), as well as at 28°C (Figure 2B right, Supplementary Table S1).  
302 Again, the magnitude of the effect was larger at 28°C.

303

#### 304 F508del-CFTR: chronic VX-770 incubation

305 When comparing cells expressing F508del-CFTR incubated for 24 hours with VX-809 alone,  
306 with those incubated with both VX-809 and VX-770, at 37°C, there was a small but significant  
307 decrease in  $\log_{10}\rho$  (Figure 2C left, Supplementary Table S1). At 28°C the decrease was again  
308 more pronounced than at 37°C (Figure 2C right).

309

#### 310 F508del-CFTR: temperature correction

311 Because our fluorescence readings are normalized to those obtained from cells expressing WT-  
312 CFTR grown on the same 96-well plate, we quantified the difference between the mean  $\log_{10}\rho$   
313 of WT-CFTR and F508del-CFTR at each temperature. The  $\log_{10}\rho$  values of F508del-CFTR  
314 were found to be significantly closer to those of WT-CFTR at 28°C, than at 37°C, (Figure 2D,  
315 Supplementary Table S1).

316

#### 317 *Increasing F508del-CFTR ion channel function*

318 Following addition of extracellular  $\Gamma^-$  ( $\Gamma^-$  first Protocol, see Methods), CFTR was  
319 activated by 10  $\mu$ M forskolin alone, or by a combination of 10  $\mu$ M forskolin and 10  $\mu$ M VX-  
320 770 (the latter defined as an acute (a) treatment, as opposed to the 24-hour chronic (c)  
321 incubation with VX-770 described above). The normalized fluorescence of HEK293-cells  
322 expressing YFP-tagged WT-CFTR, F508del-CFTR, or F508del/R1070W-CFTR was followed  
323 over time (Figure 3). The maximal rate of  $\Gamma^-$  entry was used to summarize CFTR channel  
324 function for the different CFTR genotypes, incubation and activation conditions tested (Figure  
325 3E, Supplementary Tables S2 and S3). No significant difference in this metric was detected  
326 among the different genotypes/conditions when DMSO (vehicle) was added instead of  
327 activators.

328

#### 329 WT-CFTR

330 As expected, in cells expressing WT-CFTR, the maximal rate of  $\Gamma^-$  entry was significantly  
331 higher after activation with forskolin, compared to control (DMSO), at both 37°C and 28°C

332 (Figure 3A; Figure 3E WT). However, neither the presence of 10  $\mu$ M VX-770 in addition to  
333 forskolin during activation, nor incubation at 37°C vs. 28°C modified quenching rate  
334 sufficiently to achieve statistical significance after multiple comparison correction (Figure 3A;  
335 Figure 3E, WT, Supplementary Table S3).

336

#### 337 F508del-CFTR: activation following temperature correction

338 Activation with forskolin alone failed to increase the maximal rate of  $\Gamma$  entry in untreated cells  
339 expressing F508del-CFTR (Figure 3B top; Figure 3E F508del bars 1 and 4, Supplementary  
340 Table S2), reflecting the severe gating defect which persists even after temperature correction.  
341 Acute potentiation by VX-770 was required to detect function of the channels reaching the cell  
342 surface thanks to temperature-correction (Figure 3B, bottom; Figure 3E F508del bars 5 vs. 2,  
343 Supplementary Table S2).

344

#### 345 F508del-CFTR: activation following VX-809 correction

346 At both temperatures, the activity of F508del-CFTR channels reaching the cell surface after  
347 24-hour incubation with VX-809 could be detected following acute activation with forskolin  
348 and VX-770. At 28°C the maximal rate of  $\Gamma$  entry was significantly greater than at 37°C (Figure  
349 3C; Figure 3E, F508del bar 6 vs. 3, Supplementary Table S3).

350

#### 351 F508del-CFTR: rescue of ion channel function by the R1070W mutation

352 Forskolin activation alone was enough to reveal F508del/R1070W-CFTR channel activity  
353 (Figure 3D, Supplementary Table S2). The maximal rate of  $\Gamma$  entry was significantly higher at  
354 28°C than at 37°C (Figure 3D; Figure 3E F508del/R1070W, Supplementary Table S3).

355

#### 356 *The rare mutation panel*

357 CF-causing missense CFTR mutations (Sosnay et al., 2013; Van Goor et al., 2014; Yu  
358 et al., 2012) were individually introduced in the pIRES2-mCherry-YFPCFTR plasmid, creating  
359 a panel of 62 plasmids (including WT-CFTR as reference).

360 Following expression of the panel in HEK293 cells, and incubation with no  
361 pharmacological correction, distributions for the  $\rho$  metric, and plate  $\log_{10}\rho$  means were  
362 obtained (Supplementary Table S4, Supplementary Figure S5). The data is summarized in  
363 Figure 4A, which profiles membrane density for each CFTR mutant in the panel. Correlation  
364 between our measured  $\rho$  and the proportion of CFTR acquiring complex glycosylation in FRT

365 cells is surprisingly good ( $r^2 = 0.65$ , Sosnay et al., 2013;  $r^2 = 0.48$ , Van Goor et al., 2014,  
366 Supplementary Figure S8), considering the differences in expression system and metric used  
367 (note that correlation between the two published datasets is  $r^2 = 0.48$ ).

368 YFP-CFTR fluorescence quenching experiments (I last Protocol, see Methods) were  
369 carried out to estimate steady-state CFTR conductance ( $G_{CFTR}$ ), without (DMSO) and with  
370 baseline CFTR activation by 10  $\mu$ M forskolin (Figure 4B-C; Supplementary Table S6). Again,  
371 results correlate well with published data ( $r^2 = 0.68$ , Sosnay et al., 2013;  $r^2 = 0.60$  Van Goor et  
372 al., 2014; Supplementary Figure S8). Conductance was also measured in the presence of 10  
373  $\mu$ M forskolin + 10  $\mu$ M VX-770 (Figure 4B, D; Supplementary Table S7). In these conditions,  
374 genotypes with high conductance (including WT-CFTR) have faster YFP quenching than can  
375 be reliably measured in our system. However, the assay can accurately monitor VX-770  
376 potentiation when CFTR activity is low, as is the case for most mutants (Van Goor et al., 2014).

377

#### 378 *Relationship between CFTR ion channel function and membrane density*

379 By considering the changes in ion channel function in the context of any changes  
380 measured in  $\rho$ , our assay allows more accurate inferences on the gating and permeation  
381 properties of the CFTR channel molecules present at the cell surface.

382 Even when virtually no channels are present in the plasma membrane (as happens, for  
383 instance, for cells expressing F508del-CFTR incubated at 37<sup>0</sup> C) the value of  $\rho$  does not fall to  
384 zero. This is likely due to some inaccuracy in automated cell boundary detection and to the  
385 widefield microscope optics, resulting in stray light from out-of-focus planes reaching the  
386 photomultiplier. To empirically investigate the relationship between  $G_{CFTR}$  and  $\rho$ , cells  
387 expressing F508del-CFTR were treated with increasing concentrations of corrector VX-809,  
388 progressively improving both biogenesis/membrane stability and conductance (Figure 5A;  
389 Supplementary Figure S9). Measured  $G_{CFTR}$  values as a function of  $\rho$  values show a roughly  
390 linear relationship. The trendline can be extended to cross the  $\rho$  axis, extrapolating to an  
391 intercept at  $\rho = 0.23$ . In addition, extension towards higher membrane densities shows how  
392 gating of F508del-CFTR, VX-809-corrected and acutely potentiated by VX-770, reaches levels  
393 characteristic of WT-CFTR (without potentiation), consistent with patch-clamp open  
394 probability ( $P_O$ ) measurements (Kopeikin et al., 2014; Wang et al., 2018).

395 Data on maximum rate of I entry can also be plotted against the corresponding  $\rho$  values,  
396 measured for the different F508del-CFTR rescue strategies (Figure 5B). A linear interpolation  
397 between data points for uncorrected F508del-CFTR at 37<sup>o</sup> C (representing cells with virtually  
398 no CFTR molecules at the membrane) and WT-CFTR activated by 10  $\mu$ M forskolin at 37<sup>o</sup> C  
399 describes the ion channel function we would expect from cells with increasing CFTR  
400 membrane density, assuming gating and permeation characteristics of baseline-activated WT-  
401 CFTR. This allows us to infer how rescued F508del-CFTR channels reaching the membrane  
402 compare to control channels in terms of function.

403 Introducing the R1070W revertant mutation in the F508del-CFTR background is shown  
404 to be particularly effective in improving gating. Comparing revertant rescue with temperature  
405 correction, Figure 5B shows how both strategies similarly increase membrane density but  
406 temperature-corrected F508del-CFTR channels at the membrane have very low ion channel  
407 function (unless acutely potentiated with VX-770). In contrast, F508del/R1070W channels at  
408 the membrane have gating and permeation properties equal - or even superior - to WT-CFTR  
409 (Figure 5B, cf. F508del/R1070W-CFTR red symbol vs. uncorrected F508del-CFTR blue  
410 symbol). Both results are consistent with patch-clamp records indicating a F508del/R1070W-  
411 CFTR  $P_O$  comparable to that of WT-CFTR (Liu et al., 2018), but a much lower  $P_O$  for  
412 temperature-corrected F508del-CFTR (Kopeikin et al., 2014; Liu et al., 2018; Wang et al.,  
413 2018) – note that single-channel conductance,  $\gamma$ , is unaffected by F508del and R1070W  
414 mutations (Dalemans et al., 1991; Thibodeau et al., 2010).

415 Plots of  $G_{CFTR}$  as a function of  $\rho$  for the rare-mutation panel give an overview of  
416 processing and gating/permeation defects caused by each missense mutation (Figure 5C). For  
417 instance, D579G-CFTR (orange open diamond at coordinates (0.35,41.5)) falls close to the  
418 WT-CFTR interpolation line, suggesting that the product of channel  $P_O$  and  $\gamma$  is not greatly  
419 affected by this mutation, and that the low short-circuit currents measured in FRT cells (Sosnay  
420 et al., 2013; Van Goor et al., 2014) are largely caused by the reduced membrane density. For  
421 G1244E (orange (0.75,7.2)) and S549N (blue (0.83,11)), likely altering the structure of P- and  
422 signature sequence loops, respectively, in site 2, measured ion channel function is much lower  
423 than would be expected given the high membrane density. Here low short-circuit currents  
424 (Sosnay et al., 2013) are likely due to gating defects. Most mutations give reduced membrane  
425 densities and a conductance that falls below the interpolation line, suggesting processing  
426 defects as well as some degree of impairment in gating/permeation for the molecules that do



427 reach the membrane. We further illustrate the effect of acute treatment with VX-770 for  
428 mutations resulting in the strongest potentiation (fold-potentiation >20, Figure 5D). For many  
429 of these, data points for potentiated conductance fall above the interpolation line, suggesting  
430 that  $P_{O\cdot\gamma}$  is higher than measured for WT-CFTR in baseline-activated conditions.

431

## 432 **Discussion**

### 433 *Validation of the assay and implications for pharmacological research*

434 Many CFTR variants associated with CF, including the most common, F508del-CFTR,  
435 are characterized by both processing and functional defects. Rescue of either ion channel  
436 function or membrane density alone, is not enough for effective treatment of patients carrying  
437 F508del-CFTR (Clancy et al., 2012; Flume et al., 2012), or many other mutations. Therapies  
438 combining multiple correctors/potentiators are now seen as most promising (Holguin, 2018).  
439 However, potentiators can negatively interfere with corrector action (Cholon et al., 2014; Meng  
440 et al., 2017; Veit et al., 2014). Furthermore, it has been suggested that maintaining a clear  
441 separation between correctors and potentiators does not usefully describe CFTR pharmacology  
442 (Rowe and Verkman, 2013). Practical implementation of distinct potentiator and corrector  
443 screens might have biased the search towards combination therapies, hampering discovery of  
444 modulators with true dual activity. All this highlights the potential impact of our assay, capable  
445 of simultaneously measuring pharmacological effects on membrane localization and on  
446 gating/permeation characteristics.

### 447 Membrane density

448 Our assay accurately detects changes in membrane density of CFTR, even when such  
449 changes are small and the heterogeneity among cells is large. It can pick up the minute  
450 difference in membrane density between untreated and VX-809 treated HEK293 cells  
451 incubated at 37°C (Figure 2A left). The VX-809 effect is undetectable, unless combined with  
452 temperature rescue or revertant mutations, in other systems (e.g. Okiyoneda et al., 2013). The  
453 effect of the R1070W mutation on F508del-CFTR membrane density at 37°C is similarly small  
454 (Okiyoneda et al., 2013) but our assay detects a significant difference (Figure 2B left). We  
455 were also able to confirm that the membrane density of F508del-CFTR is increased at low  
456 temperature (Denning et al., 1992; Rennolds et al., 2008; Wang et al., 2008, Figure 2D). The  
457 effects of VX-809 treatment (He et al., 2013) and R1070W rescue on membrane density are  
458 larger when combined with incubation at low temperature (Figure 2 right). In agreement with

459 other studies (Cholon et al., 2014; Meng et al., 2017; Veit et al., 2014), we observed a small  
460 but significant shift in  $\log_{10}\rho$  following chronic incubation with VX-770, consistent with the  
461 potentiator destabilizing F508del-CFTR at the membrane (Figure 2C left). Furthermore, we  
462 find that the negative effect of VX-770 on biogenesis appears more pronounced when cells are  
463 incubated at 28°C (Figure 2C). It is possible that binding of VX-770 prevents interaction with  
464 chaperone(s) which help F508del-CFTR fold and exit the ER in HEK293 cells grown at low  
465 temperature (Wang et al., 2008). However, further studies are required to confirm our  
466 observation and its physiological relevance. First, at 37°C the small signal from membrane-  
467 localised F508del-CFTR might prevent us from accurately quantifying the effect of adding  
468 VX-770 to the incubation. Second, given the high [VX-770] used (Csanády and Töröcsik,  
469 2019; Matthes et al., 2016), some of the F508del-CFTR destabilization we observe might be  
470 linked to formation of precipitates within cellular membranes, which might be more  
471 pronounced at the lower temperature. We note, however, that in our HEK293 incubation  
472 medium, as in plasma, a large proportion of the drug will be bound to proteins present in the  
473 added serum (Matthes et al., 2016).

#### 474 Ion channel function

475 In addition to membrane density, our assay quantifies channel function. Here, the assay  
476 is not optimized to measure high CFTR activities and some measurements hit the upper limit  
477 of its dynamic range (e.g. for WT-CFTR, Figs. 3 and 4, Supplementary Table S3). However,  
478 both the “I<sup>-</sup> first” protocol (Langron et al., 2017), measuring the maximal rate of I<sup>-</sup> entry  
479 ( $\frac{\Delta[I^-]_{in}}{\Delta t}$ ) during CFTR activation, and “I<sup>-</sup> last” protocol (Langron et al., 2018), estimating CFTR  
480 conductance by fitting quenching time course after steady-state activation is reached, can  
481 accurately quantify the low CFTR activities typically seen in mutants. While the “I<sup>-</sup> last”  
482 protocol is unaffected by variability in signal transduction kinetics and better accounts for  
483 changing electrochemical potential gradients, the “I<sup>-</sup> first” protocol allows faster data  
484 acquisition and less computationally intensive analysis. In line with results obtained with other  
485 techniques (e.g. Ussing chambers, high-throughput electrophysiology), our results show that  
486 both  $G_{CFTR}$  (Sosnay et al., 2013; Van Goor et al., 2014, Supplementary Figure S8) and  $\frac{\Delta[I^-]_{in}}{\Delta t}$   
487 (Billet et al., 2017; Van Goor et al., 2011, Figures 3, 5B) provide accurate estimates of CFTR  
488 activity.

489 Accurate quantification of low conductance values is advantageous in characterizing  
490 drug response by CFTR mutants, most of which have low residual activity. Our assay detects  
491 strong VX-770 potentiation for R347P-, N1303K- and H1085R-CFTR, genotypes giving no



492 significant potentiation over baseline in the Ussing chamber study (Van Goor et al., 2014).  
493 Equally, L927P- and H1045D-CFTR channels are seen to be powerfully potentiated in our  
494 assay. Acute treatment with VX-770 is most effective on L927P channels, resulting in an ~80-  
495 fold potentiation. L927P is adjacent to A928, part of the VX-770 binding site (Liu et al., 2019).  
496 Our results on N1303K are consistent with patch-clamp results demonstrating effective  
497 potentiation by VX-770 (DeStefano et al., 2018). Despite Cl<sup>-</sup> permeability in FRT cells being  
498 increased only to less than 5% of WT-CFTR-expressing cells (Van Goor et al., 2014), caution  
499 is required in classifying all such mutants as “unresponsive” to VX-770. Further investigation  
500 of possible synergies/drug-drug interactions will be required as it is likely that they might  
501 benefit from therapies combining VX-770 with other modulators, as has been proposed  
502 (DeStefano et al., 2018; Phuan et al., 2018): patch-clamp recording of how the ion channel  
503 function of these mutants is altered by simultaneous binding of VX-770 and other modulators,  
504 and studies on chronic rather than acute treatment.

505         While other functional assays, in more native systems (e.g. Ussing chamber  
506 measurements on human bronchial epithelia), will remain the “gold standard” for testing of  
507 CFTR-targeting drugs, providing licensing authorities with material on which to base decisions  
508 on treatment of patients with genotypes found only extremely rarely in the population (Ratner,  
509 2017), our assay could usefully complement these and other techniques, especially if  
510 throughput is further increased (the assay is currently run using 96-well plates but small  
511 changes could make it compatible to a 384 well plate format). Describing each CF-causing  
512 mutation with two coordinates ( $\rho$  and  $G_{CFTR}$ ) is a concise, informative way of characterizing  
513 mutations (e.g. Figure 5C) and the effects of CFTR modulators on them (e.g. Figure 5D).  
514 Implementing the assay at early stages (compound screening and structure-activity relationship  
515 studies) could better inform development of genotype-tailored therapies and give valuable  
516 insight relevant to patient stratification for clinical trial planning. In addition, our high-content  
517 assay boosts the potential for discovery of drugs simultaneously repairing both defects  
518 (correcting CFTR biogenesis and potentiating its function), and its exploitation might result in  
519 successful identification of effective and potent dual-activity modulators, a feat that has so far  
520 eluded extensive compound screens (but note proof-of-principle demonstration in Phuan et al.,  
521 2015; Phuan et al., 2011).

522

523 *Considerations on VX-770 binding and mechanism of action*

524 Empirical profiling of drug effects on the rare mutation panel can generate hypotheses  
525 on mechanism of action. Considering the sites of mutations resulting in the highest VX-770  
526 efficacy (fold-potential >20, Figure 5D), these appear to link the ATP molecule bound at  
527 site 1 (comprising Walker motifs of NBD1 and signature sequence of NBD2) to regions close  
528 to the narrowest portion of the permeation pathway, thought to constitute the CFTR gate (El  
529 Hiani and Linsdell, 2010; Gao and Hwang, 2015), and positioned adjacent to the very recently  
530 identified VX-770 binding site (Liu et al., 2019) (Figure 6).

531 Among the highly VX-770-sensitive mutations, all those surrounding the ATP and  
532 NBD/TMD interface introduce charged side chains which would interact unfavourably with  
533 other close charges in the conformation observed for phosphorylated, ATP-bound human  
534 CFTR, carrying the open-state stabilizing E1371Q mutation, 6MSM (Zhang et al., 2018b): the  
535 aspartate replacing G1349, in the NBD2 signature sequence, with the  $\gamma$ -phosphate bound at site  
536 1 (Bompadre et al., 2007); the lysine in place of N1303 in the NBD2 “socket”, with R1358 in  
537 NBD2; the arginine replacing G178, in intracellular loop 1 (ICL1) with K254, E257 and R258  
538 in ICL2 (Zhang et al., 2018b); the aspartate replacing H1054, in ICL4, with E543 in the NBD1  
539 X-loop (He et al., 2008); the arginine in place of H1085, with R1048 in transmembrane helix  
540 10, TM10 (for all listed pairs distances between  $\alpha$ -carbons in 6MSM are below 10 Å).  
541 Mutations at these sites are likely to particularly destabilize the NBD-dimerized, ABC-  
542 canonical open channel conformation, making occupancy of these states a rare event.  
543 Consistent with this interpretation, N1303K-CFTR channels appear to have almost completely  
544 lost the coupling between NBDs and TMDs that normally controls gating, and the rare openings  
545 observed are not linked to ATPase cycles at the NBDs (DeStefano et al., 2018). The fact that  
546 for all these mutants conductance is greatly increased by VX-770 suggests that drug binding  
547 might allow these channels to reach an alternative, particularly stable, open state, with a  
548 different conformation at the interface between site 1 and the TMDs.

549 It has been recently suggested that “undocking” of NBD1 from the TMDs might occur  
550 physiologically (Sigoillot et al., 2019) and a recent finding hints at the possibility that the VX-  
551 770-bound open state might comprise an undocked NBD1. The coupling helix in ICL4, buried  
552 at the interface between TMDs and NBD1 in all the CFTR structures so far reported, was  
553 identified as the region for which VX-770 binding decreases hydrogen/deuterium exchange  
554 most (Byrnes et al., 2018), as would be expected if this helix forms part of a drug-binding site.  
555 While the recent cryo-EM structure of the E1371Q CFTR mutant in complex with VX-770  
556 shows density for only one VX-770 molecule, bound in the transmembrane region (Liu et al.,

2019), it is possible that the exceptionally stable NBD1/NBD2 dimer of this mutant prevents VX-770 access to a second binding site at the ICL4/NBD1 interface. In contrast, in WT and other mutants, NBD1 undocking might expose this second site. It is interesting to note that binding of a drug at a site between TM4, TM5 and TM6 (not far from the transmembrane VX-770 binding site on CFTR) in the MsbA bacterial ABC exporter, leads to a conformational change in TM4 which is transmitted to the NBDs and results in the unusual displacement of one NBD, undocking it from the conserved network of molecular interactions generally observed at the NBD/TMD interface (Ho et al., 2018). NBD undocking in VX-770-bound CFTR, by altering the NBD1/NBD2 interface might result in deocclusion of one of the interfacial ATP-binding sites. Occupancy of this low affinity ATP-binding site, accessible on open channels, might underlie the observed prolongation of open dwell-time with increasing [ATP] (Jih and Hwang, 2013). A second VX-770 binding site, exposed by infrequent undocking of NBD1 would also be consistent with the very slow activation time-course observed upon addition of VX-770 to WT-CFTR, likely reflecting VX-770 having to sequentially occupy two sites before the  $P_O$  can increase (Csanády and Töröcsik, 2019).

The remaining two highly VX-770-sensitive mutations we identify, R347P and L927P (Figures 5D,6) insert prolines, known to restrict backbone flexibility, in a region close to the CFTR gate. R347, in TM6, is important for maintaining a stable conducting pathway (Cotten and Welsh, 1999; Cui et al., 2013; Kopeikin et al., 2010), while L927 is in the unwound segment of TM8 (Corradi et al., 2018; Liu et al., 2017), underlying CFTR's unique channel function (Liu et al., 2017). The very low conductance measured after baseline activation in both these mutants, suggests that backbone flexibility at both these sites is required for channel opening and/or to maintain an open permeation pathway (Zhang et al., 2018b). VX-770 has been hypothesized to increase conformational flexibility of CFTR (Cholon et al., 2014) overall. It is possible that this increased flexibility might particularly concern regions surrounding bound VX-770 facilitating rearrangement of the helices, allowing adoption of the alternative open state described above.

## Conclusions

The main advantage of our assay consists in providing simultaneous measurements of ion channel function and membrane density. Currently available high throughput assays report on either CFTR surface expression or CFTR-mediated cellular conductance ( $G_{CFTR}$ ).  $G_{CFTR}$  is the product of 3 factors: the number of channels at the membrane ( $N$ ),  $P_O$ , and  $\gamma$  (i.e.  $G_{CFTR} = N \cdot P_O \cdot \gamma$ ). Being able to monitor how compounds or mutations affect both number of channels

590 at the membrane and conductance can allow accurate deconvolution of effects on processing  
591 (altering  $N$ ) from those influencing gating and permeation of the channel (affecting  $P_O$  and  $\gamma$ ,  
592 respectively). Thus, used in combination with other techniques (e.g. patch-clamp, molecular  
593 dynamics and Ussing chamber measurements), the assay is a powerful tool for basic research  
594 on CFTR biophysics and biogenesis, as well as for translational research on CFTR-targeting  
595 drugs.

596 Finally, because CFTR plays an important role controlling fluid transport across several  
597 epithelia (Frizzell and Hanrahan, 2012; Saint-Criq and Gray, 2017), it has been implicated in  
598 a number of pathologies, including COPD (Solomon et al., 2017; Zhao et al., 2014), secretory  
599 diarrhoeas (Thiagarajah et al., 2015), polycystic kidney disease (Li et al., 2012) and others  
600 (Solymosi et al., 2013; Zhang et al., 2018a). It is likely that, given the complexity of CFTR  
601 folding and trafficking (Farinha and Canato, 2017; Lukacs and Verkman, 2012), many CFTR-  
602 targeting compounds will alter its cellular processing (Clunes et al., 2012), suggesting that the  
603 assay could also be usefully deployed in the development of novel CFTR-targeting drugs for  
604 other diseases, beyond CF.

605 **Author Contributions**

606 Experiments were conceived and designed by SP, EL and PV, after discussion with  
607 LDG and CH. SP and EL, with the help of ACS, CH and EJH, carried out the molecular  
608 biology, ran the fluorescence assay acquisition and ran image analysis. SP, with the help of  
609 CH, implemented the image analysis protocols and the mathematical model in the MATLAB  
610 environment. Manuscript was written by SP, EL and PV. All authors read and commented on  
611 the final draft of the manuscript.

612 **Acknowledgements**

613 EL was supported by grant 15UCL04, funded by the Sparks charity and Cystic Fibrosis  
614 Trust. SP was supported by grant SRC005 funded by the Cystic Fibrosis Trust. CH was  
615 supported by EPSRC grant EP/F500351/1, and ACS was awarded a British Pharmacological  
616 Society Vacation Studentship. We thank Dr William Andrews, Central Molecular Laboratory,  
617 UCL for help with molecular biology.

618 **Conflict of interest declaration**

619 The authors declare no conflicts of interest.

620 **References**

- 621 Billet A, Froux L, Hanrahan JW, and Becq F (2017). Development of Automated Patch  
622 Clamp Technique to Investigate CFTR Chloride Channel Function. *Front Pharmacol* 8.  
623
- 624 Bompadre SG, Sohma Y, Li M, and Hwang T-C (2007). G551D and G1349D, Two CF-  
625 associated Mutations in the Signature Sequences of CFTR, Exhibit Distinct Gating Defects. *J*  
626 *Gen Physiol* 129: 285-298.  
627
- 628 Byrnes LJ, Xu Y, Qiu X, Hall JD, and West GM (2018). Sites associated with Kalydeco  
629 binding on human Cystic Fibrosis Transmembrane Conductance Regulator revealed by  
630 Hydrogen/Deuterium Exchange. *Scientific Reports* 8: 4664.  
631
- 632 Cholon DM, Quinney NL, Fulcher ML, Esther CR, Das J, Dokholyan NV, et al. (2014).  
633 Potentiator ivacaftor abrogates pharmacological correction of deltaF508 CFTR in cystic  
634 fibrosis. *Sci Transl Med* 6: 246ra296.  
635
- 636 Clancy JP, Rowe SM, Accurso FJ, Aitken ML, Amin RS, Ashlock MA, et al. (2012). Results  
637 of a phase IIa study of VX-809, an investigational CFTR corrector compound, in subjects  
638 with cystic fibrosis homozygous for the F508del-CFTR mutation. *Thorax* 67: 12-18.  
639
- 640 Clunes LA, Davies CM, Coakley RD, Aleksandrov AA, Henderson AG, Zeman KL, et al.  
641 (2012). Cigarette smoke exposure induces CFTR internalization and insolubility, leading to  
642 airway surface liquid dehydration. *FASEB J* 26: 533-545.  
643
- 644 Corradi V, Gu R-X, Vergani P, and Tieleman DP (2018). Structure of Transmembrane Helix  
645 8 and Possible Membrane Defects in CFTR. *Biophys J* 114: 1751-1754.  
646
- 647 Cotten JF, and Welsh MJ (1999). Cystic Fibrosis-associated Mutations at Arginine 347 Alter  
648 the Pore Architecture of CFTR. Evidence for disruption of a salt bridge. *J Biol Chem* 274:  
649 5429-5435.  
650
- 651 Csanády L, and Töröcsik B (2019). Cystic fibrosis drug ivacaftor stimulates CFTR channels  
652 at picomolar concentrations. *eLife* 8: e46450.

653

654 Csanády L, Vergani P, and Gadsby DC (2019). STRUCTURE, GATING, AND  
655 REGULATION OF THE CFTR ANION CHANNEL. *Physiol Rev* 99: 707-738.

656

657 Cui G, Freeman CS, Knotts T, Prince CZ, Kuang C, and McCarty NA (2013). Two Salt  
658 Bridges Differentially Contribute to the Maintenance of Cystic Fibrosis Transmembrane  
659 Conductance Regulator (CFTR) Channel Function. *J Biol Chem* 288: 20758-20767.

660

661 Dalemans W, Barbry P, Champigny G, Jallat S, Jallat S, Dott K, et al. (1991). Altered  
662 chloride ion channel kinetics associated with the [Delta]F508 cystic fibrosis mutation. *Nature*  
663 354: 526-528.

664

665 Davies JC, Moskowitz SM, Brown C, Horsley A, Mall MA, McKone EF, et al. (2018). VX-  
666 659–Tezacaftor–Ivacaftor in Patients with Cystic Fibrosis and One or Two Phe508del  
667 Alleles. *N Engl J Med* 379: 1599-1611.

668

669 Denning GM, Anderson MP, Amara JF, Marshall J, Smith AE, and Welsh MJ (1992).  
670 Processing of mutant cystic fibrosis transmembrane conductance regulator is temperature-  
671 sensitive. *Nature* 358: 761-764.

672

673 DeStefano S, Gees M, and Hwang T-C (2018). Physiological and pharmacological  
674 characterization of the N1303K mutant CFTR. *Journal of Cystic Fibrosis*.

675

676 El Hiani Y, and Linsdell P (2010). Changes in Accessibility of Cytoplasmic Substances to the  
677 Pore Associated with Activation of the Cystic Fibrosis Transmembrane Conductance  
678 Regulator Chloride Channel. *J Biol Chem* 285: 32126-32140.

679

680 Elborn JS (2016). Cystic fibrosis. *The Lancet* 388: 2519-2531.

681

682 Farinha CM, and Canato S (2017). From the endoplasmic reticulum to the plasma membrane:  
683 mechanisms of CFTR folding and trafficking. *cell Mol Life Sci* 74: 39-55.

684

685 Farinha CM, King-Underwood J, Sousa M, Correia Ana R, Henriques Barbara J, Roxo-Rosa  
686 M, et al. (2013). Revertants, Low Temperature, and Correctors Reveal the Mechanism of



687 F508del-CFTR Rescue by VX-809 and Suggest Multiple Agents for Full Correction. *Chem*  
688 *Biol* 20: 943-955.  
689  
690 Flume PA, Liou TG, Borowitz DS, Li H, Yen K, Ordoñez CL, et al. (2012). Ivacaftor in  
691 subjects with cystic fibrosis who are homozygous for the f508del-cftr mutation. *Chest* 142:  
692 718-724.  
693  
694 Frizzell RA, and Hanrahan JW (2012). *Physiology of Epithelial Chloride and Fluid Secretion*.  
695 *Cold Spring Harb Perspect Med* 2.  
696  
697 Galiotta L, Haggie P, and Verkman A (2001a). Green fluorescent protein-based halide  
698 indicators with improved chloride and iodide affinities. *FEBS Lett* 499: 220-224.  
699  
700 Galiotta L, Jayaraman S, and Verkman A (2001b). Cell-based assay for high-throughput  
701 quantitative screening of CFTR chloride transport agonists. *Am J Physiol Cell Physiol* 281:  
702 C1734-C1742.  
703  
704 Gao X, and Hwang T-C (2015). Localizing a gate in CFTR. *Proceedings of the National*  
705 *Academy of Sciences of the United States of America* 112: 2461-2466.  
706  
707 Gentsch M, and Mall MA (2018). Ion Channel Modulators in Cystic Fibrosis. *Chest* 154:  
708 383-393.  
709  
710 He L, Aleksandrov AA, Serohijos AWR, Hegedus T, Aleksandrov LA, Cui L, et al. (2008).  
711 Multiple Membrane-Cytoplasmic Domain Contacts in the Cystic Fibrosis Transmembrane  
712 Conductance Regulator (CFTR) Mediate Regulation of Channel Gating. *J Biol Chem* 283:  
713 26383-26390.  
714  
715 He L, Kota P, Aleksandrov AA, Cui L, Jensen T, Dokholyan NV, et al. (2013). Correctors of  
716 deltaF508 CFTR restore global conformational maturation without thermally stabilizing the  
717 mutant protein. *FASEB J* 27: 536-545.  
718  
719 Ho H, Miu A, Alexander MK, Garcia NK, Oh A, Zilberleyb I, et al. (2018). Structural basis  
720 for dual-mode inhibition of the ABC transporter MsbA. *Nature* 557: 196-201.



721

722 Holguin F (2018). Triple CFTR Modulator Therapy for Cystic Fibrosis. *N Engl J Med* 379:  
723 1671-1672.

724

725 Jih K-Y, and Hwang T-C (2013). VX-770 potentiates CFTR function by promoting  
726 decoupling between the gating cycle and ATP hydrolysis cycle. *Proceedings of the National*  
727 *Academy of Sciences of the United States of America* 110: 4404-4409.

728

729 Keating D, Marigowda G, Burr L, Daines C, Mall MA, McKone EF, et al. (2018). VX-445–  
730 Tezacaftor–Ivacaftor in Patients with Cystic Fibrosis and One or Two Phe508del Alleles.  
731 *New England Journal of Medicine* 379: 1612-1620.

732

733 Kopeikin Z, Sohma Y, Li M, and Hwang T-C (2010). On the mechanism of CFTR inhibition  
734 by a thiazolidinone derivative. *J Gen Physiol* 136: 659.

735

736 Kopeikin Z, Yuksek Z, Yang HY, and Bompadre SG (2014). Combined effects of VX-770  
737 and VX-809 on several functional abnormalities of F508del-CFTR channels. *Journal of*  
738 *Cystic Fibrosis* 13: 508-514.

739

740 Langron E, Prins S, and Vergani P (2018). Potentiation of the cystic fibrosis transmembrane  
741 conductance regulator by VX-770 involves stabilization of the pre-hydrolytic, O1 state. *Br J*  
742 *Pharmacol* 175: 3990-4002.

743

744 Langron E, Simone MI, Delalande CMS, Reymond J-L, Selwood DL, and Vergani P (2017).  
745 Improved fluorescence assays to measure the defects associated with F508del-CFTR allow  
746 identification of new active compounds. *Br J Pharmacol* 174: 525-539.

747

748 Li H, Yang W, Mendes F, Amaral MD, and Sheppard DN (2012). Impact of the cystic  
749 fibrosis mutation F508del-CFTR on renal cyst formation and growth. *Am J Physiol Renal*  
750 *Physiol* 303: F1176-F1186.

751

752 Lin S-C, Karoly ED, and Taatjes DJ (2013). The human  $\Delta$ Np53 isoform triggers metabolic  
753 and gene expression changes that activate mTOR and alter mitochondrial function. *Aging*  
754 *Cell* 12: 863-872.

755

756 Liu F, Zhang Z, Csanády L, Gadsby DC, and Chen J (2017). Molecular Structure of the  
757 Human CFTR Ion Channel. *Cell* 169: 85-95.e88.

758

759 Liu F, Zhang Z, Levit A, Levring J, Touhara KK, Shoichet BK, et al. (2019). Structural  
760 identification of a hotspot on CFTR for potentiation. *Science* 364: 1184-1188.

761

762 Liu J, Bihler H, Farinha CM, Awatade NT, Romão AM, Mercadante D, et al. (2018). Partial  
763 rescue of F508del-cystic fibrosis transmembrane conductance regulator channel gating with  
764 modest improvement of protein processing, but not stability, by a dual-acting small molecule.  
765 *Br J Pharmacol* 175: 1017-1038.

766

767 Lukacs GL, and Verkman AS (2012). CFTR: folding, misfolding and correcting the  
768 [ $\Delta$ ]F508 conformational defect. *Trends Mol Med* 18: 81-91.

769

770 Ma T, Vetrivel L, Yang H, Pedemonte N, Zegarra-Moran O, Galiotta LJV, et al. (2002).  
771 High-affinity Activators of Cystic Fibrosis Transmembrane Conductance Regulator (CFTR)  
772 Chloride Conductance Identified by High-throughput Screening. *J Biol Chem* 277: 37235-  
773 37241.

774

775 Matthes E, Goepp J, Carlile GW, Luo Y, Dejgaard K, Billet A, et al. (2016). Low free drug  
776 concentration prevents inhibition of F508del CFTR functional expression by the potentiator  
777 VX-770 (ivacaftor). *British Journal of Pharmacology* 173: 459-470.

778

779 Meng X, Wang Y, Wang X, Wrennall JA, Rimington TL, Li H, et al. (2017). Two Small  
780 Molecules Restore Stability to a Subpopulation of the Cystic Fibrosis Transmembrane  
781 Conductance Regulator with the Predominant Disease-causing Mutation. *J Biol Chem* 292:  
782 3706-3719.

783

784 Okiyoneda T, Veit G, Dekkers JF, Bagdany M, Soya N, Xu H, et al. (2013). Mechanism-  
785 based corrector combination restores  $\Delta$ F508-CFTR folding and function. *Nat Chem Biol*  
786 9: 444-454.

787

788 Pedemonte N, Lukacs GL, Du K, Caci E, Zegarra-Moran O, Galiotta LJV, et al. (2005a).  
789 Small-molecule correctors of defective [Delta]F508-CFTR cellular processing identified by  
790 high-throughput screening. *J Clin Invest* 115: 2564-2571.

791

792 Pedemonte N, Sonawane ND, Taddei A, Hu J, Zegarra-Moran O, Suen YF, et al. (2005b).  
793 Phenylglycine and Sulfonamide Correctors of Defective [Delta]F508 and G551D Cystic  
794 Fibrosis Transmembrane Conductance Regulator Chloride-Channel Gating. *Mol Pharmacol*  
795 67: 1797-1807.

796

797 Phuan P-W, Son J-H, Tan J-A, Li C, Musante I, Zlock L, et al. (2018). Combination  
798 potentiator ('co-potentiator') therapy for CF caused by CFTR mutants, including N1303K,  
799 that are poorly responsive to single potentiators. *Journal of Cystic Fibrosis*.

800

801 Phuan P-W, Veit G, Tan J, Finkbeiner WE, Lukacs GL, and Verkman AS (2015).  
802 Potentiators of Defective  $\Delta$ F508-CFTR Channel Gating that do not Interfere with Corrector  
803 Action. *Mol Pharmacol* 88: 791-799.

804

805 Phuan P-W, Yang B, Knapp JM, Wood AB, Lukacs GL, Kurth MJ, et al. (2011).  
806 Cyanoquinolines with Independent Corrector and Potentiator Activities Restore  
807 [delta]Phe508-Cystic Fibrosis Transmembrane Conductance Regulator Chloride Channel  
808 Function in Cystic Fibrosis. *Mol Pharmacol* 80: 683-693.

809

810 Ratner M (2017). FDA deems in vitro data on mutations sufficient to expand cystic fibrosis  
811 drug label. *Nature Biotechnology* 35: 606.

812

813 Rennolds J, Boyaka PN, Bellis SL, and Cormet-Boyaka E (2008). Low temperature induces  
814 the delivery of mature and immature CFTR to the plasma membrane. *Biochem Biophys Res*  
815 *Commun* 366: 1025-1029.

816

817 Riordan JR, Rommens JM, Kerem B, Alon N, Rozmahel R, Grzelczak Z, et al. (1989).  
818 Identification of the cystic fibrosis gene: cloning and characterization of complementary  
819 DNA. *Science* 245: 1066-1073.

820

821 Rommens JM, Iannuzzi MC, Kerem B-s, Drumm ML, Melmer G, Dean M, et al. (1989).  
822 Identification of the Cystic Fibrosis Gene: Chromosome Walking and Jumping. *Science* 245:  
823 1059-1065.  
824

825 Rowe SM, and Verkman AS (2013). Cystic Fibrosis Transmembrane Regulator Correctors  
826 and Potentiators. *Cold Spring Harb Perspect Med* 3: a009761.  
827

828 Saint-Criq V, and Gray MA (2017). Role of CFTR in epithelial physiology. *Cellular and*  
829 *Molecular Life Sciences* 74: 93-115.  
830

831 Shaner NC, Campbell RE, Steinbach PA, Giepmans BNG, Palmer AE, and Tsien RY (2004).  
832 Improved monomeric red, orange and yellow fluorescent proteins derived from *Discosoma*  
833 *sp.* red fluorescent protein. *Nat Biotechnol* 22: 1567.  
834

835 Sigoillot M, Overtus M, Grodecka M, Scholl D, Garcia-Pino A, Laeremans T, et al. (2019).  
836 Domain-interface dynamics of CFTR revealed by stabilizing nanobodies. *Nature*  
837 *Communications* 10: 2636.  
838

839 Solomon GM, Fu L, Rowe SM, and Collawn JF (2017). The therapeutic potential of CFTR  
840 modulators for COPD and other airway diseases. *Current Opinion in Pharmacology* 34: 132-  
841 139.  
842

843 Solymosi EA, Kaestle-Gembardt SM, Vadász I, Wang L, Neye N, Chupin CJA, et al. (2013).  
844 Chloride transport-driven alveolar fluid secretion is a major contributor to cardiogenic lung  
845 edema. *Proceedings of the National Academy of Sciences of the United States of America*  
846 110: E2308-E2316.  
847

848 Sosnay PR, Siklosi KR, Van Goor F, Kaniecki K, Yu H, Sharma N, et al. (2013). Defining  
849 the disease liability of variants in the cystic fibrosis transmembrane conductance regulator  
850 gene. *Nat Genet* 45: 1160-1167.  
851

852 Thiagarajah JR, Donowitz M, and Verkman AS (2015). Secretory diarrhoea: mechanisms and  
853 emerging therapies. *Nat Rev Gastroenterol Hepatol* 12: 446-457.  
854

855 Thibodeau PH, Richardson JM, Wang W, Millen L, Watson J, Mendoza JL, et al. (2010). The  
856 Cystic Fibrosis-causing Mutation deltaF508 Affects Multiple Steps in Cystic Fibrosis  
857 Transmembrane Conductance Regulator Biogenesis. *J Biol Chem* 285: 35825-35835.  
858

859 Van Goor F, Hadida S, Grootenhuis PDJ, Burton B, Cao D, Neuberger T, et al. (2009).  
860 Rescue of CF airway epithelial cell function in vitro by a CFTR potentiator, VX-770.  
861 *Proceedings of the National Academy of Sciences of the United States of America* 106:  
862 18825-18830.  
863

864 Van Goor F, Hadida S, Grootenhuis PDJ, Burton B, Stack JH, Straley KS, et al. (2011).  
865 Correction of the F508del-CFTR protein processing defect in vitro by the investigational drug  
866 VX-809. *Proceedings of the National Academy of Sciences of the United States of America*  
867 108: 18843-18848.  
868

869 Van Goor F, Straley KS, Cao D, Gonzalez J, Hadida S, Hazlewood A, et al. (2006). Rescue  
870 of [Delta]F508-CFTR trafficking and gating in human cystic fibrosis airway primary cultures  
871 by small molecules. *Am J Physiol Lung Cell Mol Physiol* 290: L1117-1130.  
872

873 Van Goor F, Yu H, Burton B, and Hoffman BJ (2014). Effect of ivacaftor on CFTR forms  
874 with missense mutations associated with defects in protein processing or function. *J Cyst*  
875 *Fibros* 13: 29-36.  
876

877 Veit G, Avramescu RG, Perdomo D, Phuan P-W, Bagdany M, Apaja PM, et al. (2014). Some  
878 gating potentiators, including VX-770, diminish F508del-CFTR functional expression. *Sci*  
879 *Transl Med* 6: 246ra297.  
880

881 Wainwright CE, Elborn JS, Ramsey BW, Marigowda G, Huang X, Cipolli M, et al. (2015).  
882 Lumacaftor–Ivacaftor in Patients with Cystic Fibrosis Homozygous for Phe508del CFTR. *N*  
883 *Engl J Med* 373: 220-231.  
884

885 Wang X, Koulov AV, Kellner WA, Riordan JR, and Balch WE (2008). Chemical and  
886 Biological Folding Contribute to Temperature-Sensitive ΔF508 CFTR Trafficking. *Traffic* 9:  
887 1878-1893.  
888

889 Wang Y, Cai Z, Gosling M, and Sheppard DN (2018). Potentiation of the cystic fibrosis  
890 transmembrane conductance regulator Cl<sup>-</sup> channel by ivacaftor is temperature independent.  
891 American Journal of Physiology-Lung Cellular and Molecular Physiology 315: L846-L857.  
892

893 Yang H, Shelat AA, Guy RK, Gopinath VS, Ma T, Du K, et al. (2003). Nanomolar Affinity  
894 Small Molecule Correctors of Defective [Delta]F508-CFTR Chloride Channel Gating. J Biol  
895 Chem 278: 35079-35085.  
896

897 Yu H, Burton B, Huang C-J, Worley J, Cao D, Johnson Jr JP, et al. (2012). Ivacaftor  
898 potentiation of multiple CFTR channels with gating mutations. J Cyst Fibros 11: 237-245.  
899

900 Zhang J, Wang Y, Jiang X, and Chan HC (2018a). Cystic fibrosis transmembrane  
901 conductance regulator—emerging regulator of cancer. Cellular and Molecular Life Sciences  
902 75: 1737-1756.  
903

904 Zhang Z, Liu F, and Chen J (2018b). Molecular structure of the ATP-bound, phosphorylated  
905 human CFTR. Proceedings of the National Academy of Sciences of the United States of  
906 America.  
907

908 Zhao R, Liang X, Zhao M, Liu S-L, Huang Y, Idell S, et al. (2014). Correlation of Apical  
909 Fluid-Regulating Channel Proteins with Lung Function in Human COPD Lungs. PLOS ONE  
910 9: e109725.  
911  
912

913 **Figures and figure legends**

914

915 **Figure 1**

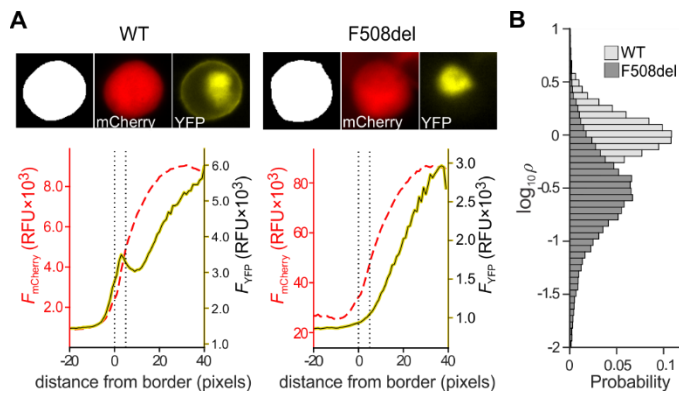

916

917 Image analysis to quantify CFTR membrane density (**A**) Image analysis of individual  
 918 representative HEK293 cells transfected with pIRES2-mCherry-YFP-WT-CFTR (left), and  
 919 pIRES2-mCherry-YFP-F508del-CFTR (right). Upper panels: boundary delimiting cell (white)  
 920 from non-cell (black) is obtained from mCherry image (centre). CFTR cellular localization is  
 921 obtained from YFP image (right). Lower panels: average mCherry fluorescence intensity  
 922 ( $F_{mCherry}$ , red dashed line), and average YFP fluorescence intensity ( $F_{YFP}$ , solid yellow line), as  
 923 a function of the distance from cell border. Membrane density is defined as

$$924 \quad \rho = \frac{F_{YFP \text{ membrane}}}{F_{mCherry \text{ cell}}}$$

925 where  $F_{YFP \text{ membrane}}$  is the average fluorescence intensity within the ‘membrane’ zone, set  
 926 between 0 and 5 pixels from the cell border. (**B**) Probability density distribution of  $\log_{10}\rho$  for  
 927 cells expressing YFP-WT-CFTR (light grey), and YFP-F508del-CFTR (dark grey), incubated  
 928 at 37 °C. For the representative cells shown in panel A, WT:  $\rho = 1.60$ ; F508del:  $\rho = 0.25$ .

929 **Figure 2**

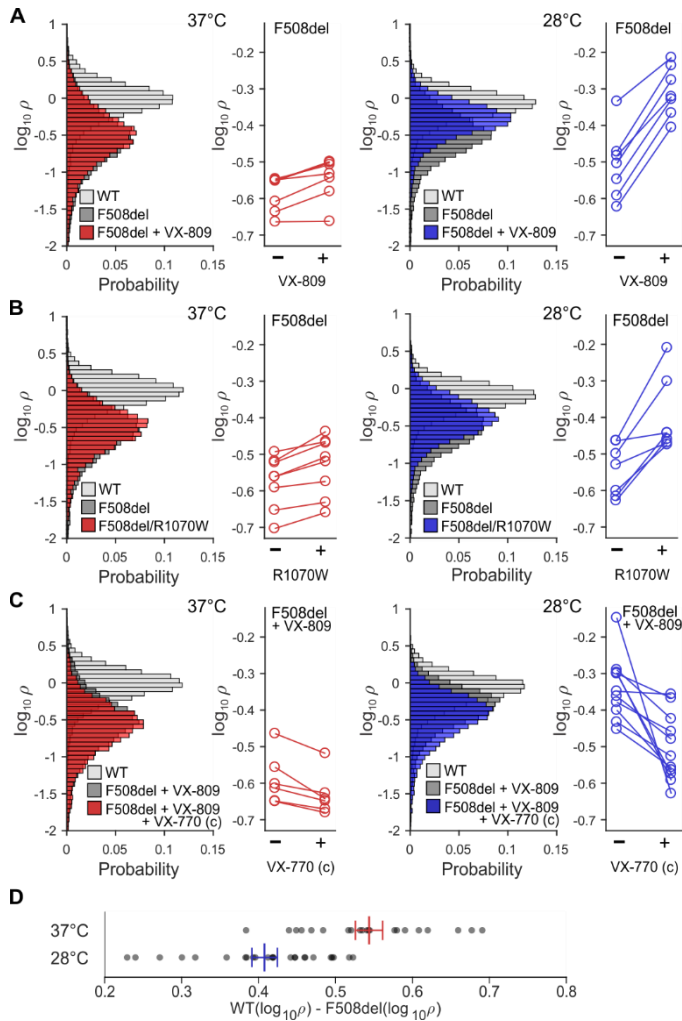

930

931

932 Monitoring CFTR membrane density ( $\log_{10}\rho$ ) in HEK293 cells expressing WT-CFTR,  
 933 F508del-CFTR, or F508del/R1070W-CFTR. Effects of chronic treatment with 10  $\mu$ M VX-809  
 934 (A), R1070W rescue (B), and chronic treatment with 10  $\mu$ M VX-809 + 10  $\mu$ M VX-770 (C),  
 935 on  $\log_{10}\rho$  at 37°C (left, red) and 28°C (right, blue). Conditions of final incubation were  
 936 maintained during image acquisition. The probability distributions in the panels on the left,  
 937 contain  $\log_{10}\rho$  measurements from thousands of cells, pooled from all experiments. For  
 938 statistical analysis, mean  $\log_{10}\rho$  values determined in independent experiments, and paired per  
 939 plate, were used (displayed in panels on the right) (D) Before imaging, plates were incubated  
 940 at 37°C, or 28°C for 24 hours. For each plate, the difference between mean  $\log_{10}\rho$  for WT-  
 941 CFTR and F508del-CFTR was calculated ( $WT(\log_{10}\rho) - F508del(\log_{10}\rho)$ , grey dots). Red  
 942 (37°C) and blue (28°C) lines show mean  $\pm$  SEM, calculated from 21(37°C) and 25(28°C)  
 943 within-plate difference estimates.

944



945 **Figure 3**

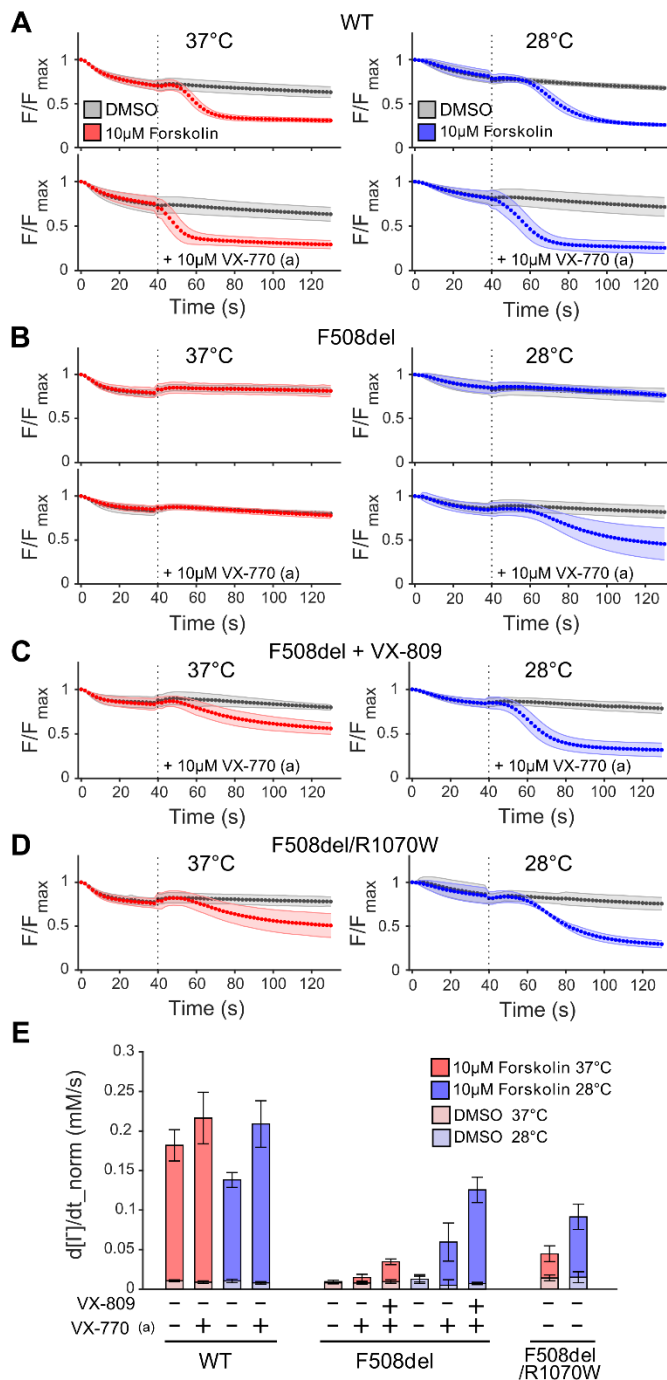

946

947 Monitoring CFTR ion channel function. (A-D) Quenching of YFP fluorescence in HEK293  
 948 cells expressing WT-CFTR (A), F508del-CFTR chronically (24 h) treated with DMSO (B) or  
 949 with VX-809 (C), and R1070W/F508del-CFTR (D). For more information on statistical  
 950 analysis see Supplementary Tables S2 and S3. Prior to imaging plates were incubated for 24  
 951 hours, at 37°C (left panels, red) or 28°C (right panels, blue). This final incubation temperature  
 952 was maintained throughout image acquisition. At time point 0 s  $I^-$  was added to the extracellular  
 953 medium. At 40 s forskolin and, where indicated, VX-770 (acute, a) was added (dotted line),

954 both to a final concentration of 10  $\mu$ M. The fluorescence before addition of  $\Gamma$  ( $F_{\max}$ ), was used  
955 to normalize YFP fluorescence intensity. **(E)** The maximal rate of  $\Gamma$  entry ( $d[\Gamma]/dt_{\text{norm}}$ ) is  
956 used to summarize CFTR function for genotypes and conditions shown in **(A-D)**.

957 **Figure 4**

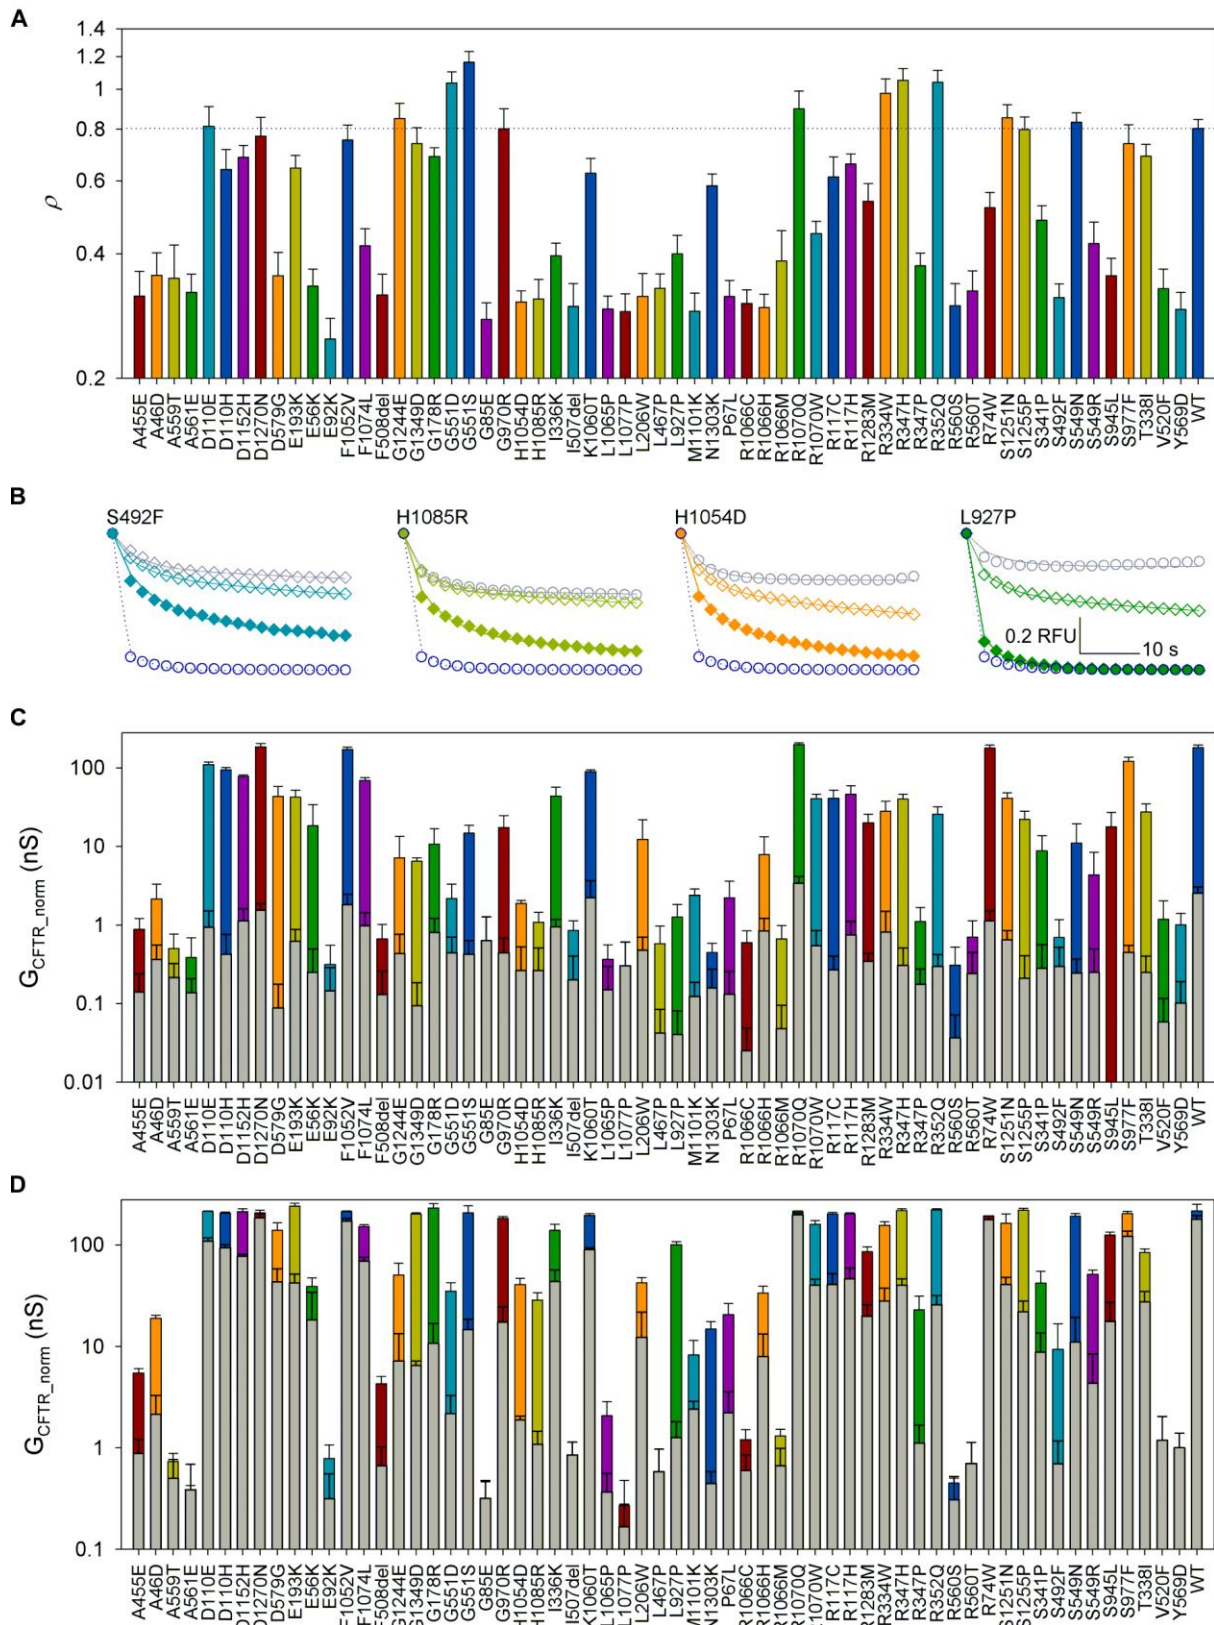

958 Rare CF-mutation profiling. **(A)** Mean  $\rho$  ( $n \geq 9$ ) of all mutations in the panel. Dotted line  
959 indicates mean  $\rho$  for WT-CFTR. For  $\rho$  distributions, mean  $\rho$  and  $n$  values for each mutant see  
960 Supplementary Figure S5 and Supplementary Table S4. **(B)** Observed YFP quenching time  
961 course in the presence of DMSO (grey circles) or 10  $\mu$ M forskolin (empty coloured diamonds),  
962 or 10  $\mu$ M forskolin + acute 10  $\mu$ M VX-770 (filled coloured diamonds) for selected mutations.  
963 Solid lines show predicted change in proportion of anion-free YFP. For estimated parameters  
964  $G_{CFTR}$ ,  $V_M$ ,  $G_{trans}$  and  $\tau_{trans}$  see Supplementary Table S10. WT-CFTR quenching in 10  $\mu$ M  
965 forskolin (dark blue empty circles and dotted line) shown for comparison. **(C)** CFTR  
966 conductance of rare mutation panel after activation with 10  $\mu$ M forskolin (coloured bars) or  
967 vehicle control (DMSO, grey bars).  $n \geq 3$ .  $G_{CFTR}$  obtained from fitting of quenching time-course  
968 for each mutant was normalized using the mean within cell mCherry fluorescence for that  
969 mutant, measured with respect to the corresponding metric obtained for WT-CFTR on the same  
970 plate. **(D)** Potentiation of rare mutation panel by VX-770. Grey bars show values following  
971 activation with 10  $\mu$ M forskolin alone, coloured bars with further addition of acute 10  $\mu$ M VX-  
972 770. For more information on statistical analysis of quenching data see Supplementary Tables  
973 S6 and S7.

974 **Figure 5**

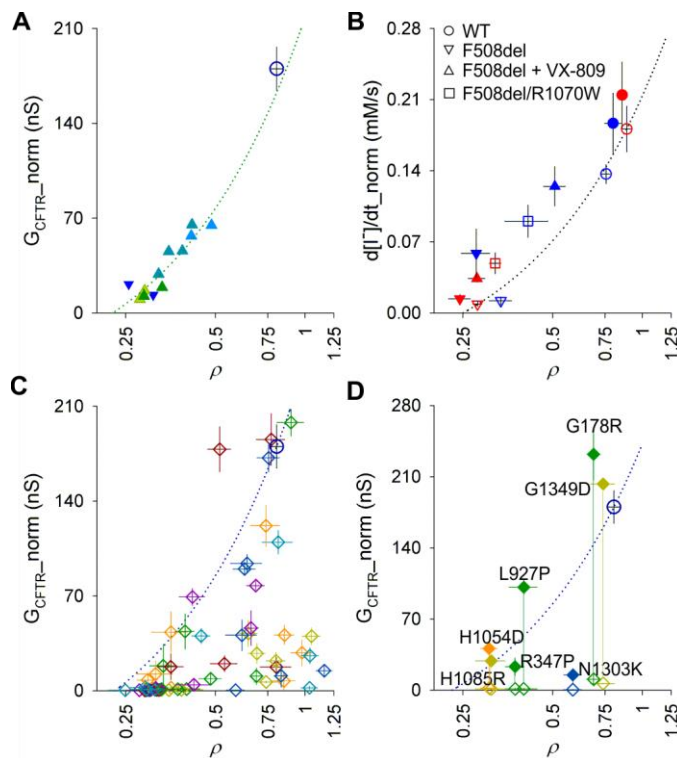

975

976 Investigating permeation/gating characteristics. (A) Relationship between normalized CFTR  
 977 conductance and membrane density in cells expressing F508del-CFTR with no correction (blue  
 978  $\nabla$ ) or incubated with increasing concentrations of VX-809 (1 nM to 10  $\mu$ M, green to light blue  
 979  $\Delta$ ), all after activation with 10  $\mu$ M forskolin and acute potentiation with 10  $\mu$ M VX-770.  
 980 F508del-CFTR incubation and measurements were at 28°C. Green dotted line shows linear  
 981 regression using only F508del-CFTR data points on graph (slope = 281.7, constant = -63.7,  
 982 resulting in an x-axis intercept at  $\rho = 0.23$ ). Mean value for WT-CFTR activated with 10  $\mu$ M  
 983 forskolin alone is shown for reference (from (C), large dark blue empty circle). (B)  
 984 Relationship between maximal rate of  $I^-$  influx and  $\rho$  in HEK293 cells expressing WT-CFTR,  
 985 F508del-CFTR, and F508del/R1070W-CFTR, at 37°C (red symbols) and 28°C (blue symbols).  
 986 10  $\mu$ M forskolin was used to activate CFTR. Empty symbols indicate activation with forskolin  
 987 alone. Solid symbols indicate further acute potentiation with 10  $\mu$ M VX-770. Dotted line:  
 988 linear interpolation between data obtained at 37°C for uncorrected F508del-CFTR (used as an  
 989 empirical measure of minimal membrane density) and WT-CFTR, both without acute VX-770  
 990 potentiation; slope = 0.284, constant = -0.071, resulting in an x-axis intercept at  $\rho = 0.25$ . (C)  
 991 Relationship between baseline  $G_{CFTR\_norm}$  (10  $\mu$ M forskolin) and  $\rho$  for rare mutation panel.  
 992 Colours as in Figure 4. WT-CFTR is highlighted as a large, dark blue, empty circle. The dark

993 blue dotted line (slope = 314.1, constant= -72.3) shows linear interpolation between WT data  
994 points and x-axis intercept set at  $\rho = 0.23$ , as obtained in (A). (D) Mutants with largest fold  
995 potentiation by VX-770 (ratio between conductance obtained in 10  $\mu\text{M}$  forskolin + 10  $\mu\text{M}$  VX-  
996 770 over that in 10  $\mu\text{M}$  forskolin alone > 20). Empty diamonds indicate baseline activation  
997 with 10  $\mu\text{M}$  forskolin alone, solid diamonds indicate activation following acute potentiation  
998 with 10  $\mu\text{M}$  forskolin + 10  $\mu\text{M}$  VX-770.

999 **Figure 6**

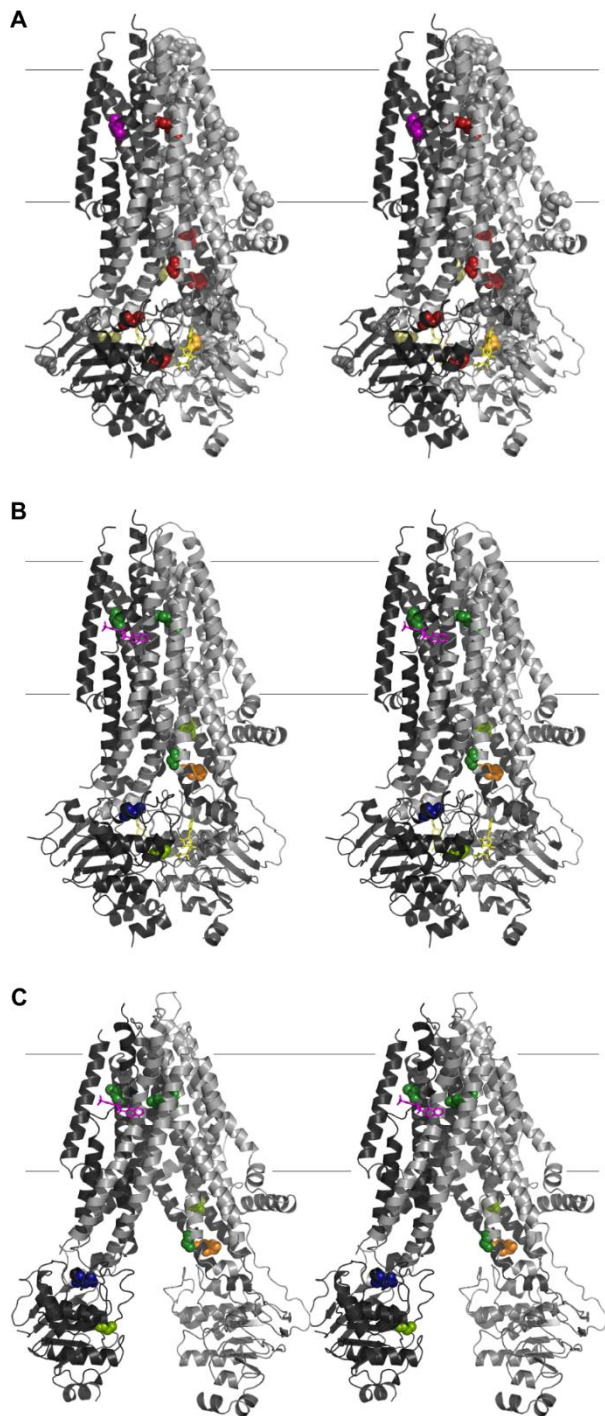

1000

1001 Mapping VX-770 sensitivity on cryo-EM structures. **(A)** Cartoon representation (cross-eye  
1002 stereo) of phosphorylated, ATP-bound human CFTR, 6MSM (Zhang et al., 2018b), with sites  
1003 of missense mutations in panel highlighted as spheres. Colours indicate degree of VX-770-  
1004 potentiation (fold potentiation,  $F < 5$ , grey;  $5 < F < 10$ , white;  $10 < F < 15$ , light yellow;  $15 < F$   
1005  $< 20$ , orange;  $20 < F < 50$ , red;  $F > 50$  purple). TMD1-NBD1 in light grey; TMD2-NBD2 in  
1006 dark grey. Fine horizontal lines show approximate position of membrane boundary. **(B)** Only



1007 positions with most efficacious VX-770 potentiation are shown. Magenta sticks show position  
1008 of bound VX-770 in 6O2P structure (Liu et al., 2019). Mutation-site residues are colour-coded  
1009 as in Fig. 4 (moving from cytosol to extracellular): G1349, light green; N1303, dark blue;  
1010 H1054, orange; G178, forest; H1085, light green; R347, forest right; L927 forest left. (C)  
1011 Orientation as in (A,B) but using atom coordinates of dephosphorylated human CFTR, 5UAK  
1012 (Liu et al., 2017).  
1013
